# Supplementary material
Source: PubMed Central journal article supplement (PMC3631522)

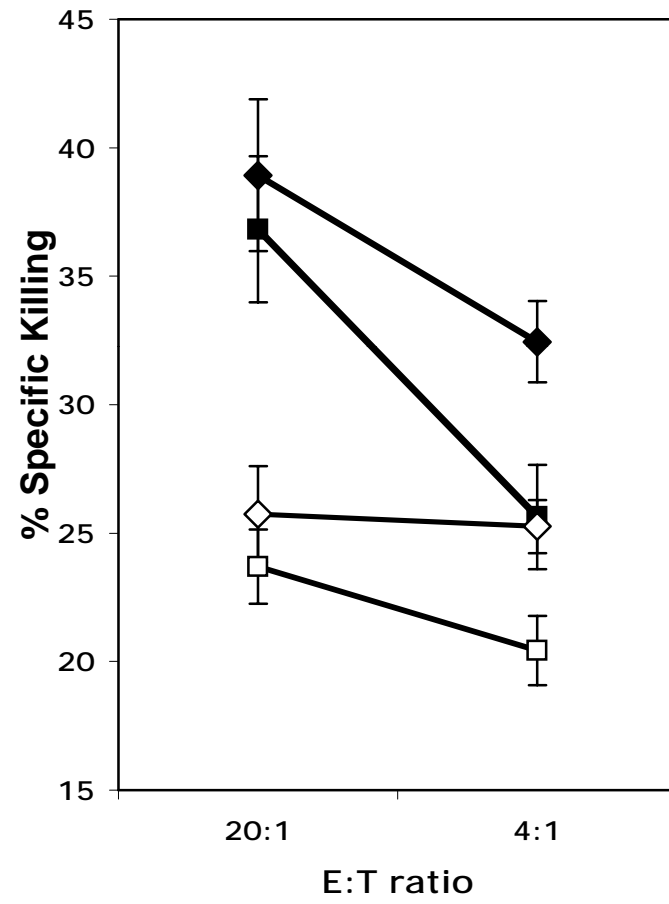

Supplement: NIHMS451109-supplement-Figure_1.pdf [file NIHMS451109-supplement-Figure_1.pdf]
